# Supplementary material for: Microtubule Acetylation Controls MDA-MB-231 Breast Cancer Cell Invasion through the Modulation of Endoplasmic Reticulum Stress
Source: MDPI journal article supplement (doi:10.3390/ijms22116018), 2021-06-02
Supplement: s1 [file s1]

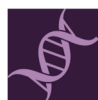

Supplementary Material

# Microtubule Acetylation Controls MDA-MB-231 Breast Cancer Cell Invasion through the Modulation of Endoplasmic Reticulum Stress

Panseon Ko<sup>1,§</sup>, Jee-Hye Choi<sup>1,§</sup>, Seongeun Song<sup>1</sup>, Seula Keum<sup>1</sup>, Jangho Jeong<sup>1</sup>, Ye Eun Hwang<sup>1</sup>, Jung Woong Kim<sup>1</sup> and Sangmyung Rhee<sup>1,\*</sup>

<sup>1</sup> Department of Life Science, Chung-Ang University, Seoul, 06974 Republic of Korea; godor1@cau.ac.kr, choijh97@cau.ac.kr

<sup>§</sup> P. K and J.C contributed equally to this article

\* Correspondence: [Sangmyung.rhee@cau.ac.kr](mailto:Sangmyung.rhee@cau.ac.kr); Tel.: +82-2-820-5818; Fax: +82-2-825-5206

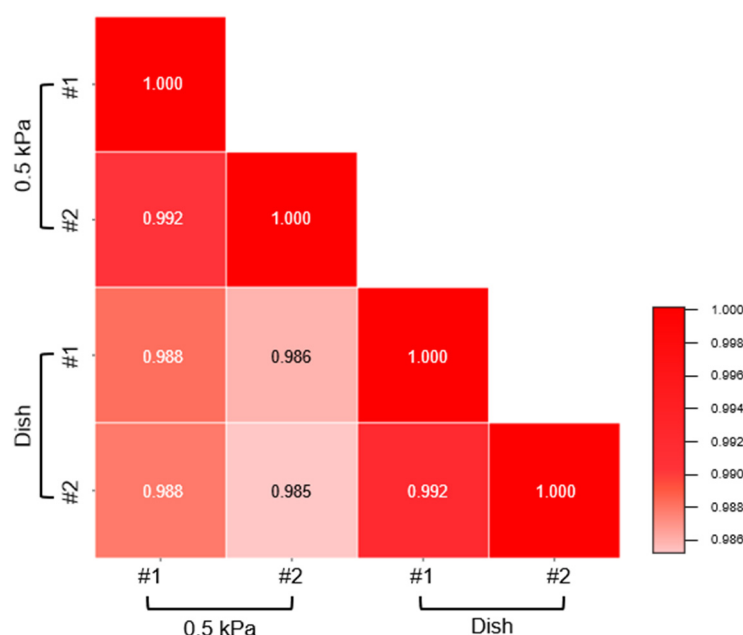

**Figure S1. Correlation matrix between RNA-seq data for MDA-MB-231 cells.**

Correlograms showing Pearson's correlation coefficients across RNA-seq raw data obtained from two biologically independent experiments of MDA-MB-231 cells cultured on the 0.5 kPa matrix and dish. Numbers in each box indicate Pearson's correlation coefficient values ( $r$ ).

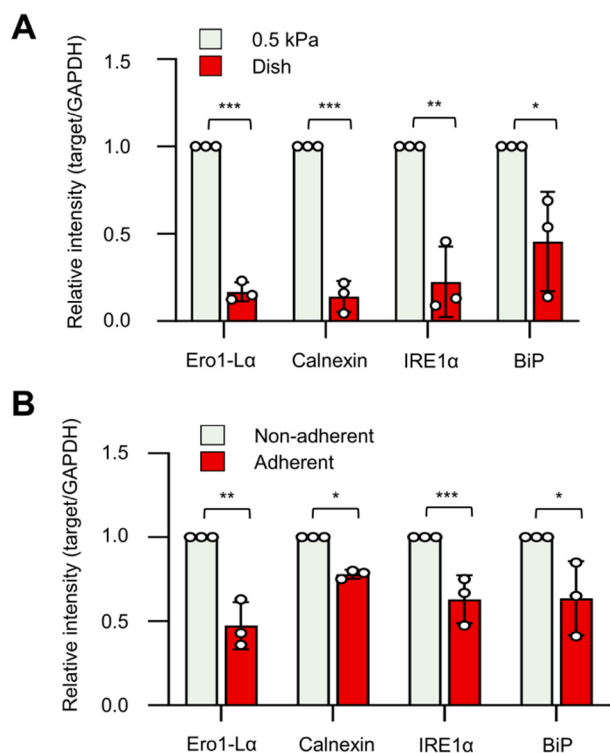

**Figure S2. Relative expression of ER stress markers in MDA-MB-231 cells cultured on the various culture conditions.** (A) Quantification of relative expression of ER stress markers, Ero1-L $\alpha$ , Calnexin (CANX), IRE1 $\alpha$ , and BiP, in MDA-MB-231 cells cultured on the stiff or soft matrix. (B) Quantification of relative expression of ER stress markers in MDA-MB-231 cells cultured on the nonadherent or adherent plates. Western blot results were obtained through three biologically independent experiments. Band intensity was quantified by densitometry using a Quantity One® system. Relative intensity of target band was normalized by the band intensity of GAPDH. The values represent the mean  $\pm$  SD of relative intensities and were analyzed using Student's t-test. \* $p$  < 0.01, \*\* $p$  < 0.01, \*\*\* $p$  < 0.001

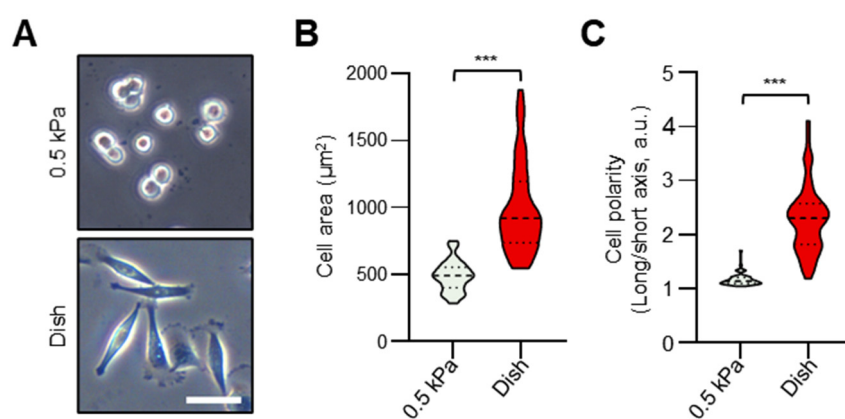

**Figure S3.** Cell area and polarity are modulated by ECM stiffness. (A) Phase-contrast images of MDA-MB-231 cells cultured on 0.5-kPa PAGs or dishes. Scale bar, 50 μm. The graphs present the cell area (B) and cell polarity (C) from approximately 100 cells shown in (A). \*\*\* $p < 0.001$ .

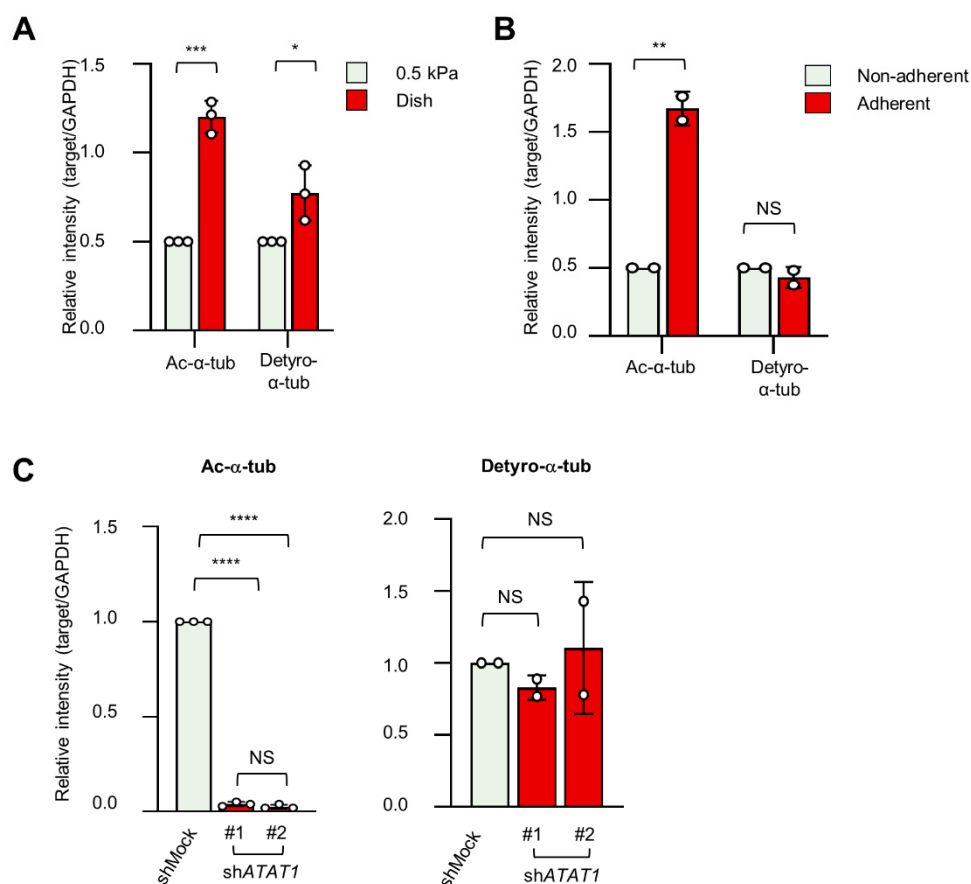

**Figure S4. Relative expression of acetylated and detyrosinated  $\alpha$ -tubulin in MDA-MB-231 cells cultured on the various conditions.** (A) Relative expression of acetylated and detyrosinated  $\alpha$ -tubulin in MDA-MB-231 cells cultured on the stiff or soft matrix. (B) Relative expression of acetylated and detyrosinated  $\alpha$ -tubulin in MDA-MB-231 cells cultured on the nonadherent or adherent plates. (B) Relative expression of acetylated and detyrosinated  $\alpha$ -tubulin in *ATAT1* KD MDA-MB-231 cells using shRNA. Western blot results were obtained from at least two biologically independent experiments. Band intensity was quantified by densitometry using a Quantity One® system. Relative intensity of target band was normalized by the band intensity of GAPDH. The values represent the mean  $\pm$  SD of relative intensities and were analyzed using Student's t-test. \* $p$  < 0.01, \*\* $p$  < 0.01, \*\*\* $p$  < 0.001, \*\*\*\* $p$  < 0.0001

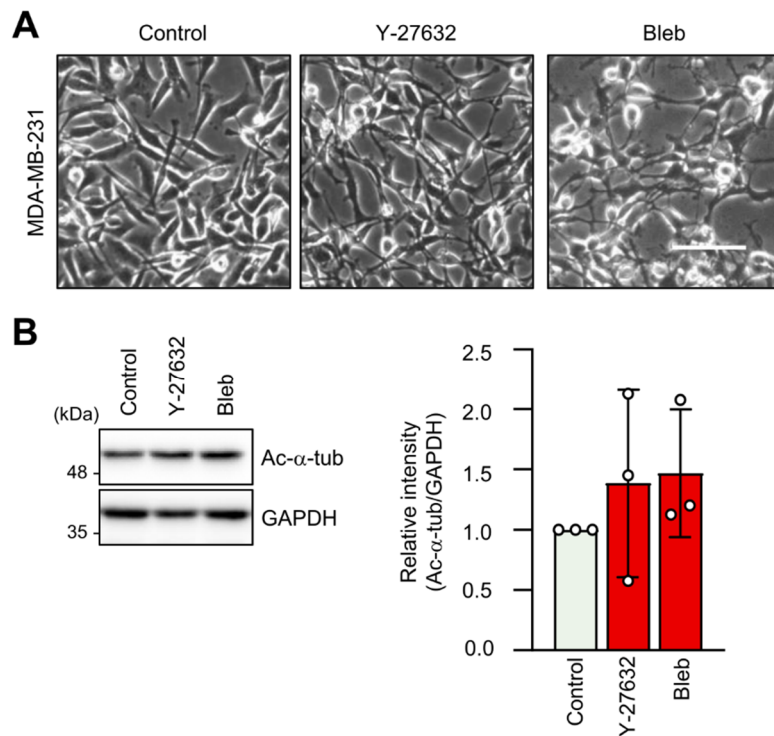

**Figure S5. Microtubule acetylation in a stiff matrix is not affected by alterations in the actomyosin contractility.** (A) Morphology of MDA-MB-231 cells treated with 10  $\mu$ M Y-27632 or 10  $\mu$ M blebbistatin for 24 h. Scale bar, 50  $\mu$ m. (B) Lysates of MDA-MB-231 cells treated with 10  $\mu$ M Y-27632 or 10  $\mu$ M blebbistatin for 24 h were subjected to western blotting analysis for the quantification of the levels of acetylated  $\alpha$ -tubulin. GAPDH was analyzed as a loading control.

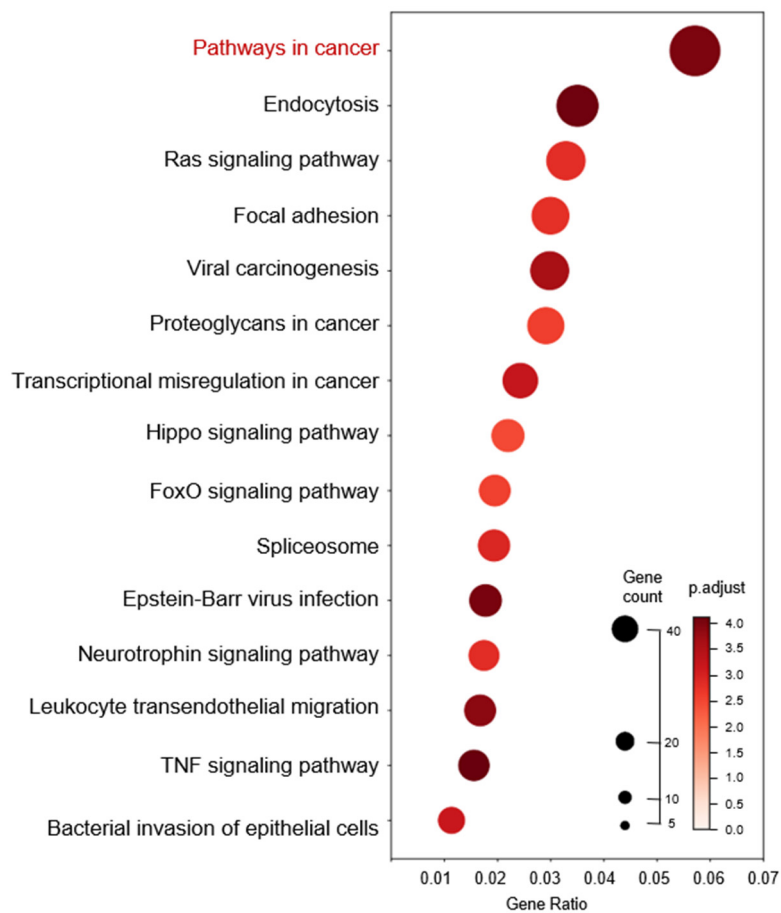

**Figure S6. KEGG pathway enrichment analysis of DEGs between *ATAT1* KO and control cells cultured on the dish.** The x-axis indicates the gene ratio, i.e., the ratio of DEGs in the given gene ontology (GO) term. The y-axis indicates KEGG pathways. Dot size represents the number of genes in each KEGG pathway.

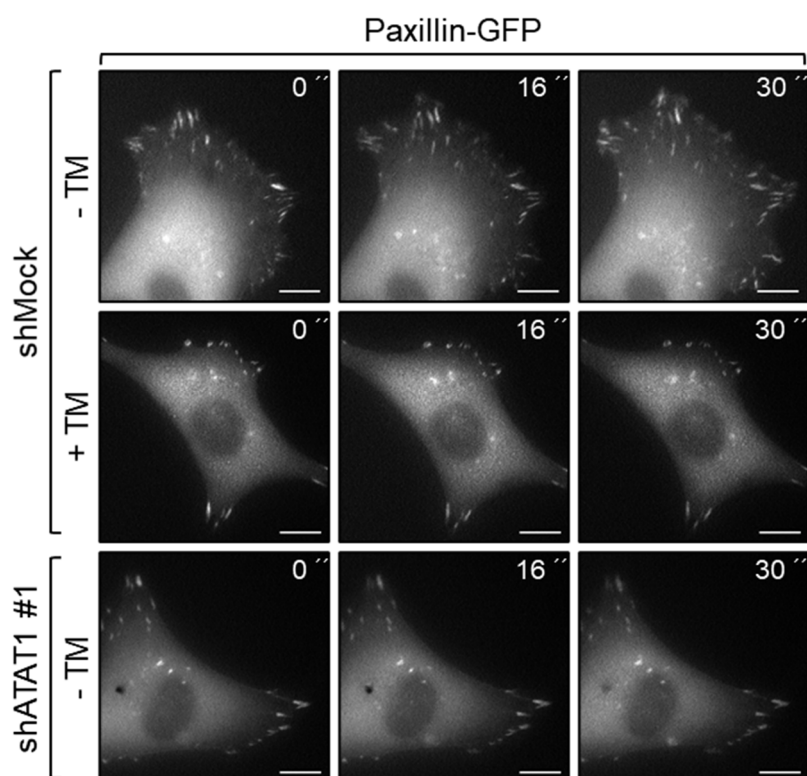

**Figure S7. Focal adhesion assembly is modulated by ER stress and microtubule acetylation.**

Paxillin-GFP-expressing shMock- and shATAT1 #1-treated MDA-MB-231 cells were starved for 16 h in serum-free RPMI1640 medium and then stimulated with 10% FBS with or without 20 ng/ml tunicamycin. The cells were monitored at 2-min intervals for 30 min. Representative images were acquired 0, 16, and 30 min after FBS stimulation. Scale bar, 10  $\mu$ m.

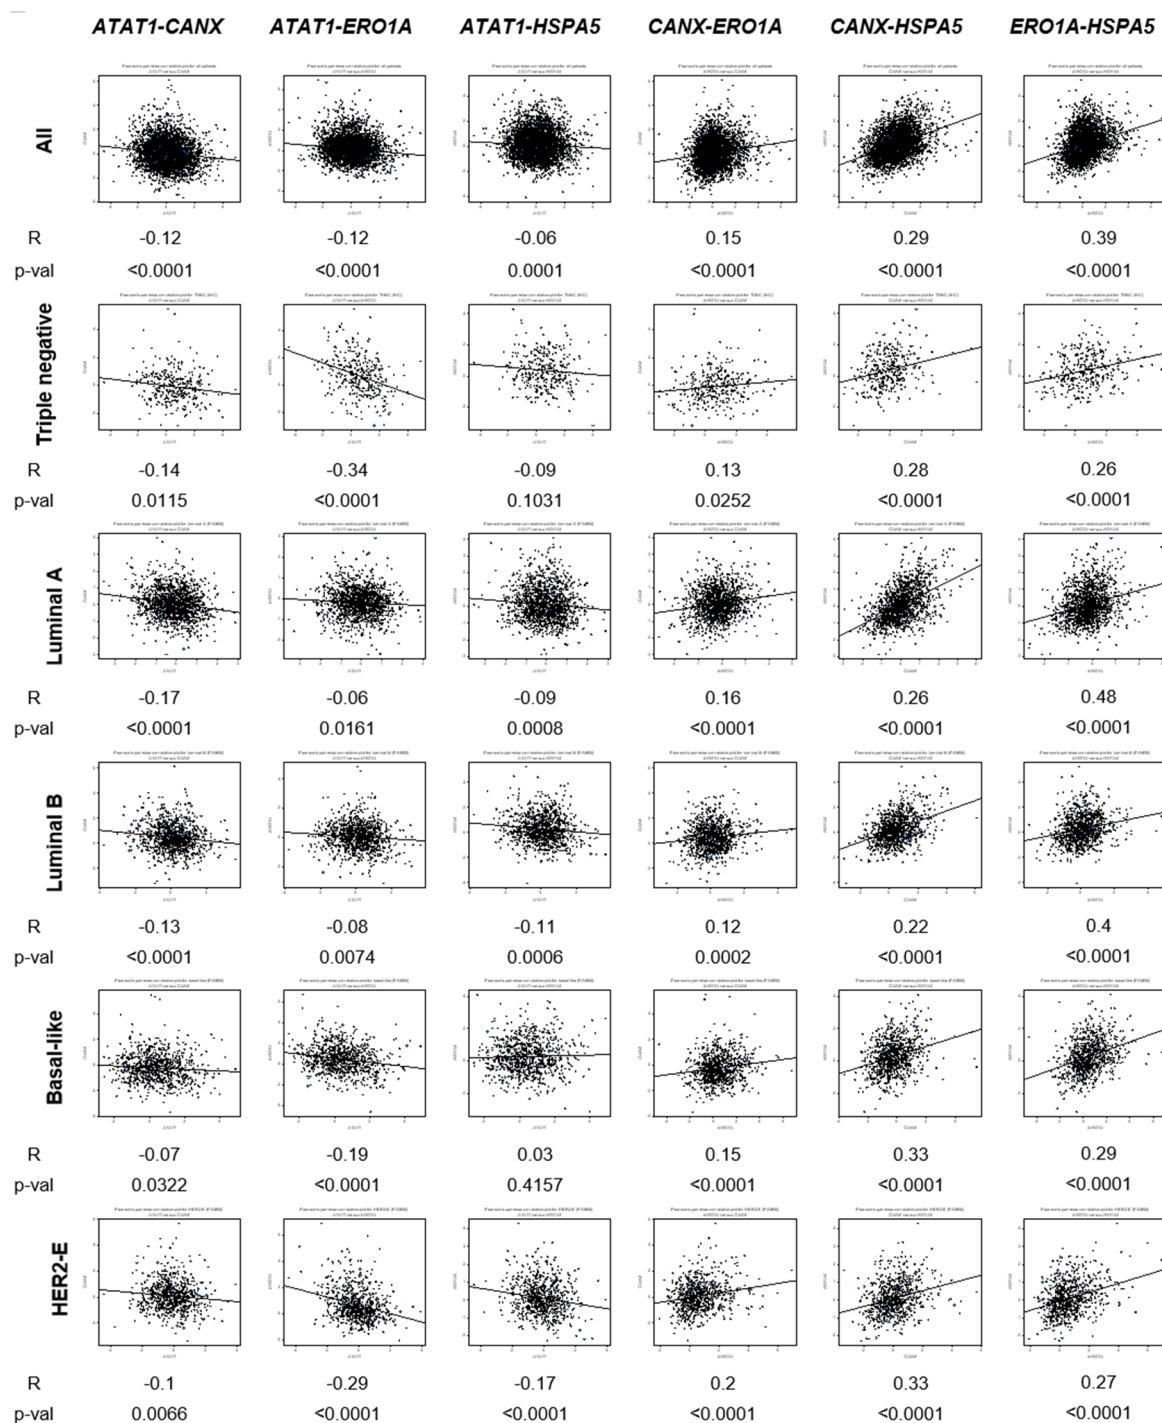

**Figure S8** Correlation analysis between *ATAT1* expression and each ER stress marker in various types of breast cancer using public RNA-seq data sets. Pearson's correlations between mRNA levels of *ATAT1* and ER stress marker genes in breast cancer patients based on the bc-GenExMiner RNA-seq dataset (n = 4,712).



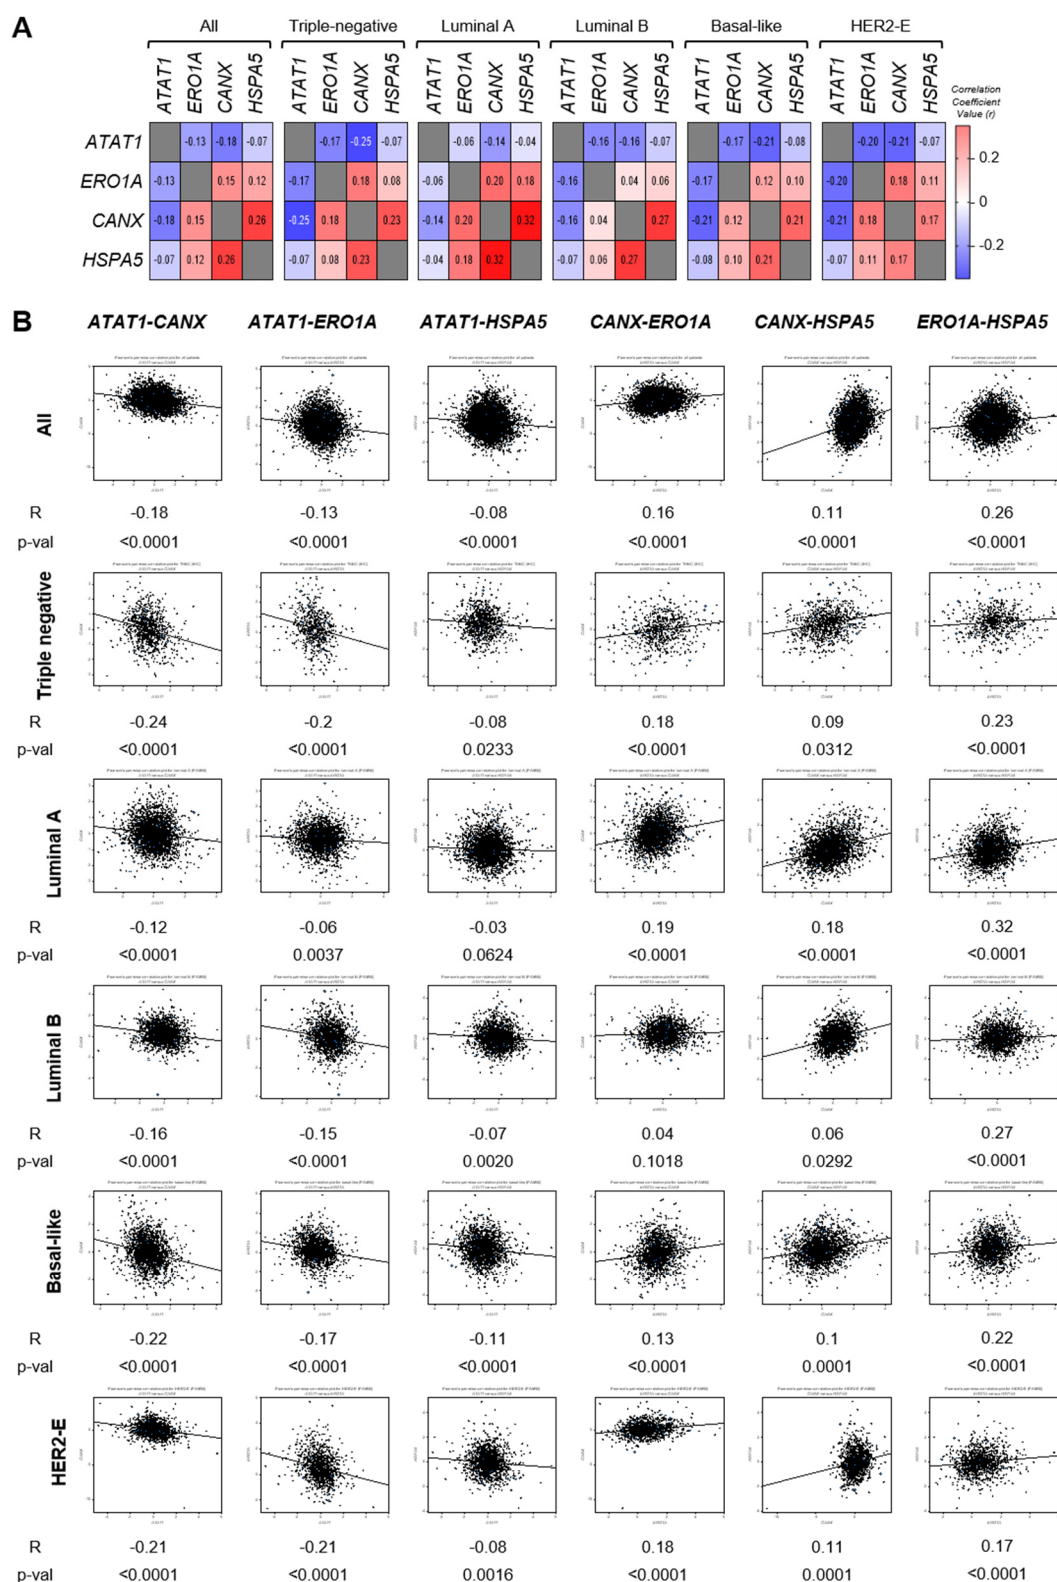

**Figure S9. Correlation analysis between *ATAT1* expression and each ER stress marker in various types of breast cancer using public microarray data sets. (A)** Pearson's correlation matrices between expression levels of *ATAT1* and ER stress marker genes in various types of breast cancers. Blue color indicates a negative correlation, and red color indicates a positive correlation. Gray color corresponds to a higher correlation. **(B)** Correlation analysis between *ATAT1* and each ER stress marker based on public microarray data sets. DNA microarray data (n = 10,001) were obtained from the bc-GenExMiner dataset.

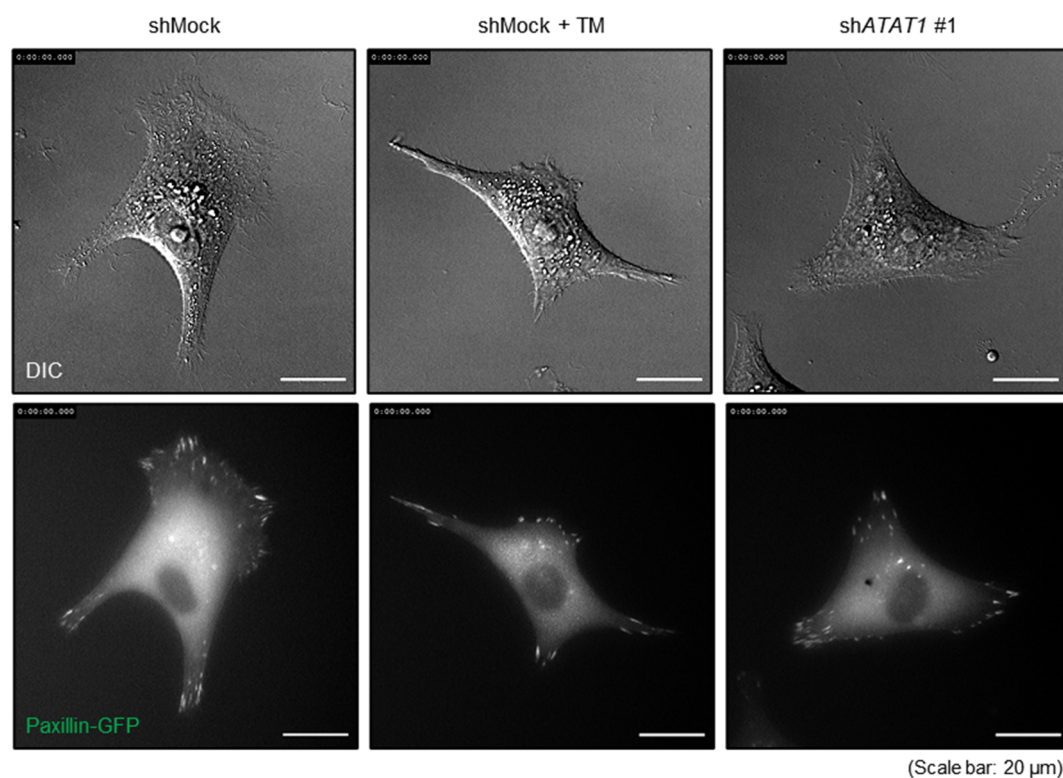

**Video S1.** Live imaging of newly formed focal adhesions in *ATAT1*-knockdown or tunicamycin-treated cells. Paxillin-GFP-expressing shMock- and sh*ATAT1* #1-treated MDA-MB-231 cells were starved for 16 h in serum-free RPMI1640 medium and then stimulated with 10% FBS with or without 20 ng/ml tunicamycin. The cells were monitored at 2-min intervals for 30 min. Related to Figure S4. Scale bars, 10 μm.

Table S1. List of primers used for RT-qPCR

| Target gene   |   | Primer sequence (5' to 3') |
|---------------|---|----------------------------|
| <i>DDIT3</i>  | F | GGTATGAGGACCTGCAAGAGGT     |
|               | R | CTTGTGACCTCTGCTGGTTCTG     |
| <i>XBP1</i>   | F | CTGCCAGAGATCGAAAGAAGGC     |
|               | R | CTCCTGGTTCTCAACTACAAGGC    |
| <i>ARF4</i>   | F | CACAGTATGGGATGTTGGTGGTC    |
|               | R | GCAGCTCATCTGCTACTTCCTG     |
| <i>MYC</i>    | F | CCTGGTGCTCCATGAGGAGAC      |
|               | R | CAGACTCTGACCTTTTGCCAGG     |
| <i>MITF</i>   | F | GGCTTGATGGATCCTGCTTTGC     |
|               | R | GAAGGTTGGCTGGACAGGAGTT     |
| <i>RASSF1</i> | F | AGTGGGAGACACCTGACCTTTC     |
|               | R | GAAGCCTGTGTAAGAACCGTCC     |
| <i>MAPK8</i>  | F | GACGCCTTATGTAGTGACTCGC     |
|               | R | TCCTGGAAAGAGGATTTTGTGGC    |
| <i>ETS1</i>   | F | GAGTCAACCCAGCCTATCCAGA     |
|               | R | GAGCGTCTGATAGGACTCTGTG     |
| <i>BCL2</i>   | F | GAACTGGGGGAGGATTGTGG       |
|               | R | GCCGGTTCAGGTACTCAGTC       |
| <i>CXCL8</i>  | F | CTTGGCAGCCTTCCTGATTT       |
|               | R | GGGGTGGAAAGGTTTGGAGTAT     |
| <i>FGF1</i>   | F | ATGGCACAGTGGATGGGACAAG     |
|               | R | TAAAAGCCCGTCGGTGTCCATG     |
| <i>GAPDH</i>  | F | GAGTCAACGGATTGTGTCGT       |
|               | R | TFTGGTCATGAGTCCTTCCA       |
